# Supplementary material for: Dual-network DNA–silk fibroin hydrogels with controllable surface rigidity for regulating chondrogenic differentiation
Source: Royal Society of Chemistry journal article supplement (doi:10.1039/d3mh01581e), 2024-01-01
Supplement: d3mh01581e1.pdf [file d3mh01581e1.pdf]

## **Dual-network DNA-Silk fibroin hydrogels with controllable surface rigidity for regulating chondrogenic differentiation**

Ziyang Zhou<sup>a,b,c,d,e,#</sup>, Peiran Song<sup>a,b,c,#</sup>, Yan Wu<sup>a,b,c,#</sup>, Miaomiao Wang<sup>a,b,c,#</sup>,  
Congyi Shen<sup>a,b,c,d,e</sup>, Zhixin Ma<sup>a,b,c,d,e</sup>, Xiaoxiang Ren<sup>a,b,c</sup>, Xiuhui Wang<sup>a,b,c</sup>, Xiao  
chen<sup>f</sup>, Yan Hu<sup>f</sup>, Zuhao Li<sup>a,b,c,f</sup>, Qin Zhang<sup>a,b,c,\*</sup>, Mengmeng Li<sup>a,b,c,\*</sup>, Zhen Geng<sup>a,b,c,\*</sup>,  
and Jiacan Su<sup>a,b,c,f,\*</sup>

a Institute of Translational Medicine, Shanghai University, Shanghai, 200444, China.

b Organoid Research Center, Shanghai University, Shanghai, 200444, China.

c National Center for Translational Medicine (Shanghai) SHU Branch, Shanghai University, Shanghai, 200444, China.

d School of Medicine, Shanghai University, Shanghai, 200444, China.

e School of Life Sciences, Shanghai University, Shanghai, 200444, China.

f Department of Orthopedics, Xinhua Hospital, Shanghai Jiao Tong University School of Medicine, Shanghai, 200092, China.

**Table S1.** DNA sequences information (The bold sequences are the sticky ends).

|    | ssDNA sequence (5' to 3')                       | Length (nt) |
|----|-------------------------------------------------|-------------|
| Y1 | CCTGTCTGCCTAATGTGCGTCGTAAGT <b>AACTGGACACTT</b> | 39          |
| Y2 | CTTACGACGCACAAGGAGATCATGAGT <b>AACTGGACACTT</b> | 39          |
| Y3 | CTCATGATCTCCTTTAGGCAGACAGG <b>AACTGGACACTT</b>  | 39          |
| L1 | CTACGGTGAATGGAATTCTCATGCGAATAGAAAGTGTCCAGTT     | 44          |
| A  |                                                 |             |
| L2 | TCTATTTCGCATGAGAATTCATTACCCGTAGAAAGTGTCCAGTTA   | 44          |

**Table S2.** Primer sequences used for quantitative RT-PCR

| Target gene | Forward primer        | Reverse primer        |
|-------------|-----------------------|-----------------------|
| GAPDH       | GAAGAAGGTGGTGAAGCAGG  | CACTGTTGAAGTCGCAGGAG  |
| Sox 9       | GCGGAGGAAGTCGGTGAAGAA | AAGATGGCGTTGGGCGAGAT  |
| T           |                       |                       |
| ACAN        | GGAGGAGCAGGAGTTTGTCAA | TGTCCATCCGACCAGCGAAA  |
| COL II      | CACGCTCAAGTCCCTCAACA  | TCTATCCAGTAGTCACCGCTC |
| T           |                       |                       |

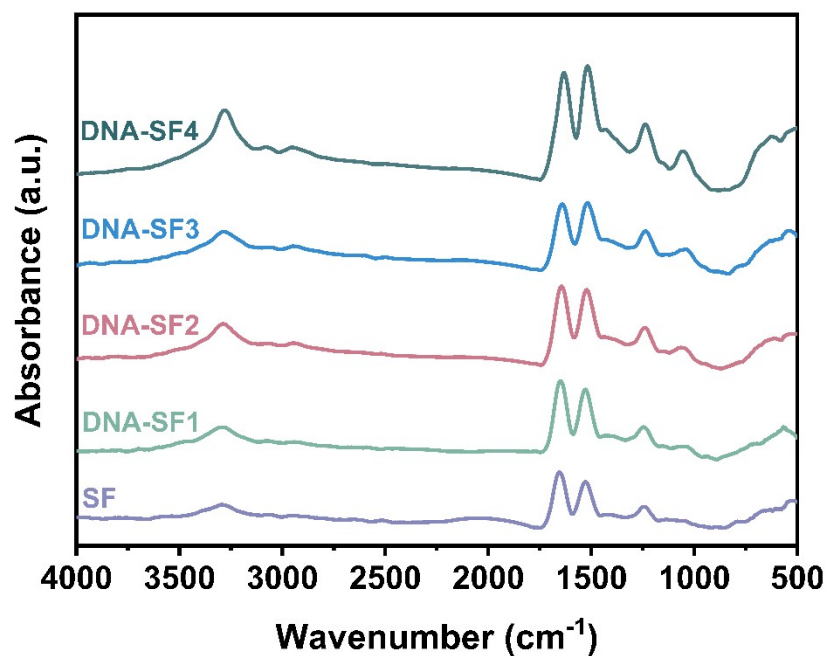

**Figure S1.** Full FTIR spectra of SF hydrogels and DNA-SF hydrogels.

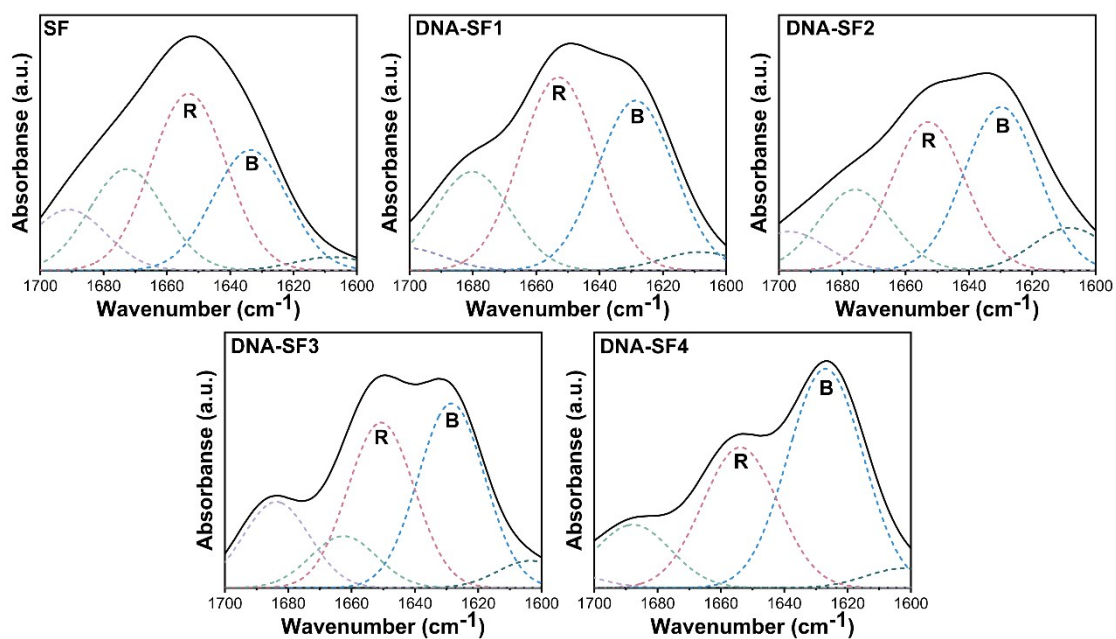

**Figure S2.** Absorbance spectra of SF hydrogels and DNA-SF hydrogels deduced after Fourier self-deconvolution (random coil marked as R and  $\beta$ -sheet marked as B).

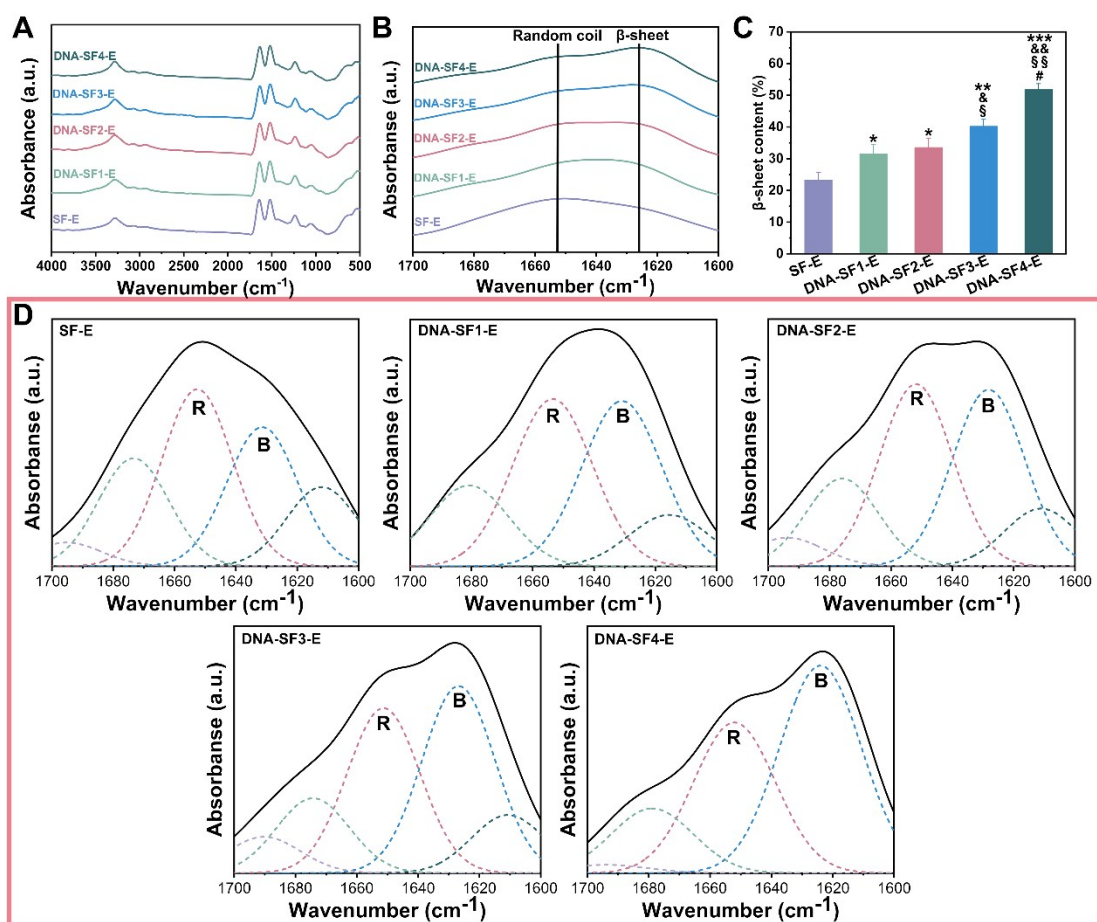

**Figure S3.** (A) Full FTIR spectra of SF-E hydrogels and DNA-SF-E hydrogels. (B) FTIR analysis of SF-E hydrogels and DNA-SF-E hydrogels (1600-1700  $\text{cm}^{-1}$ ). (C)  $\beta$ -sheet content of SF hydrogels and dual-network DNA-SF hydrogels. (D) Absorbance spectra of SF-E hydrogels and DNA-SF-E hydrogels deduced after Fourier self-deconvolution (random coil marked as R and  $\beta$ -sheet marked as B). (\*: compared to value at SF-E groups, &: compared to value at DNA-SF1-E groups, §: compared to value at DNA-SF2-E groups, #: compared to value at DNA-SF3-E groups.)

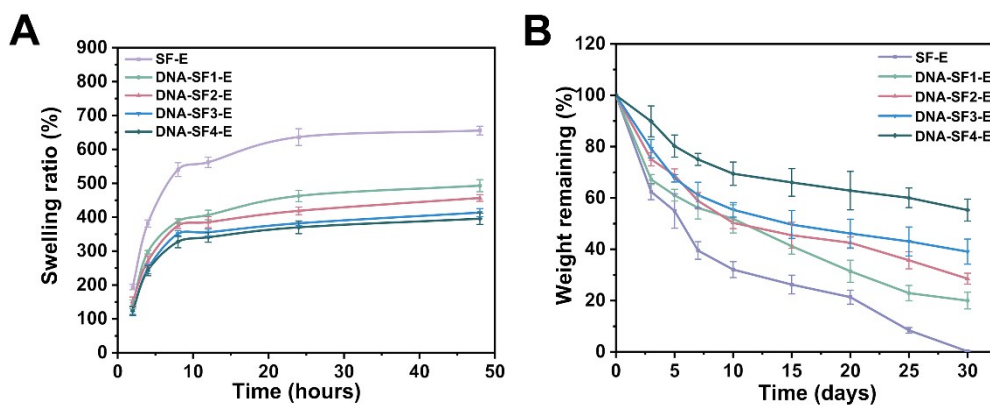

**Figure S4.** (A) The swelling ratio of SF-E hydrogels and DNA-SF-E hydrogels in PBS at 37 °C. (B) *In vitro* degradation curves of SF-E hydrogels and DNA-SF-E hydrogels in protease XIV solution at 37 °C.

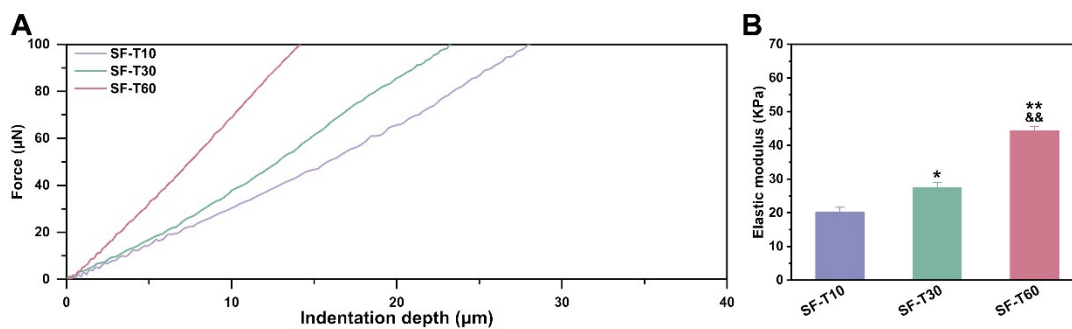

**Figure S5.** Mechanical properties of the SF-T10, SF-T30 and SF-T60 hydrogels (treat with ethanol for 10, 30, and 60 seconds respectively). (A) Stress-strain curves of SF hydrogels tested by nanoindenter. (B) Elastic modulus of SF hydrogels. (\*: compared to value at SF-T30 group, &: compared to value at SF-T30 group.)

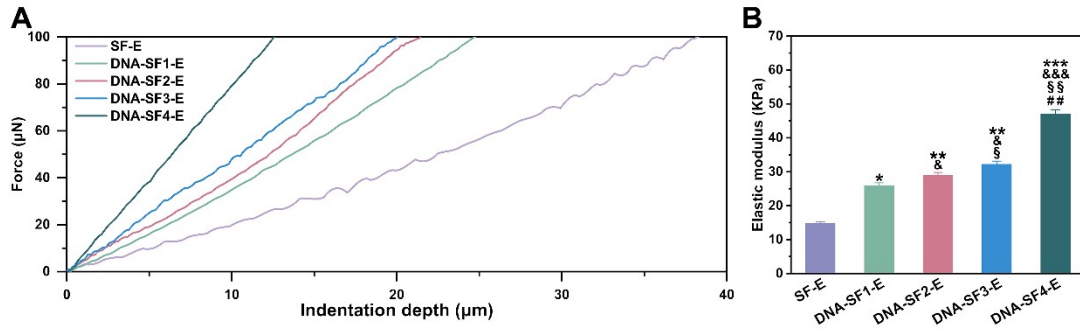

**Figure S6.** Mechanical properties of the SF-E hydrogels and DNA-SF-E hydrogels. (A) Stress-strain curves of SF hydrogels tested by nanoindenter. (B) Elastic modulus of SF hydrogels. (\*: compared to value at SF-E group, &: compared to value at DNA-SF1-E group, §: compared to value at DNA-SF2-E group, #: compared to value at DNA-SF3-E group.)

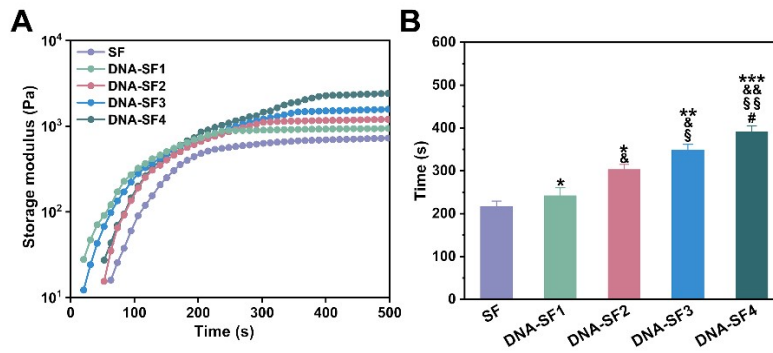

**Figure S7.** (A) The time scan of SF hydrogels and DNA-SF hydrogels. (B) The time required for the hydrogels to reach a stable state. (\*: compared to value at SF-E group, &: compared to value at DNA-SF1-E group, §: compared to value at DNA-SF2-E group, #: compared to value at DNA-SF3-E group.)

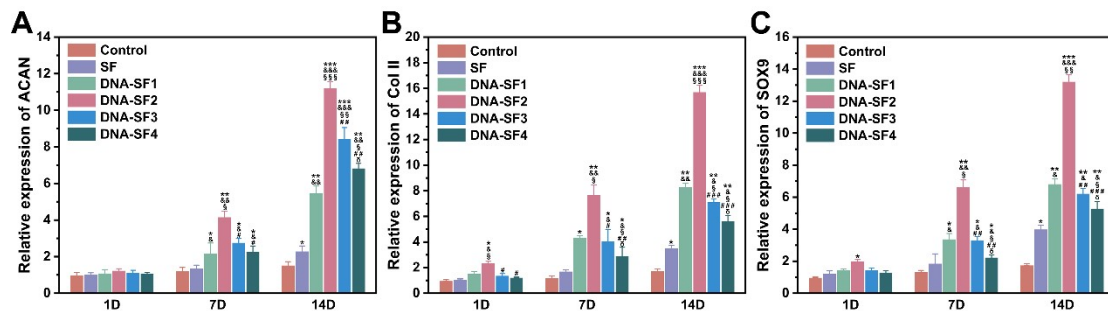

**Figure S8.** qRT-PCR results of mRNA expression of (A) ACAN, (B) Sox9 and (C) collagen II in BMSCs cultured on SF hydrogels and DNA-SF hydrogels for 1, 7 and 14 days. (\*: compared to

value at Control groups, &: compared to value at SF groups, §: compared to value at DNA-SF1 groups, #: compared to value at DNA-SF2 groups, δ: compared to value at DNA-SF3 groups.)

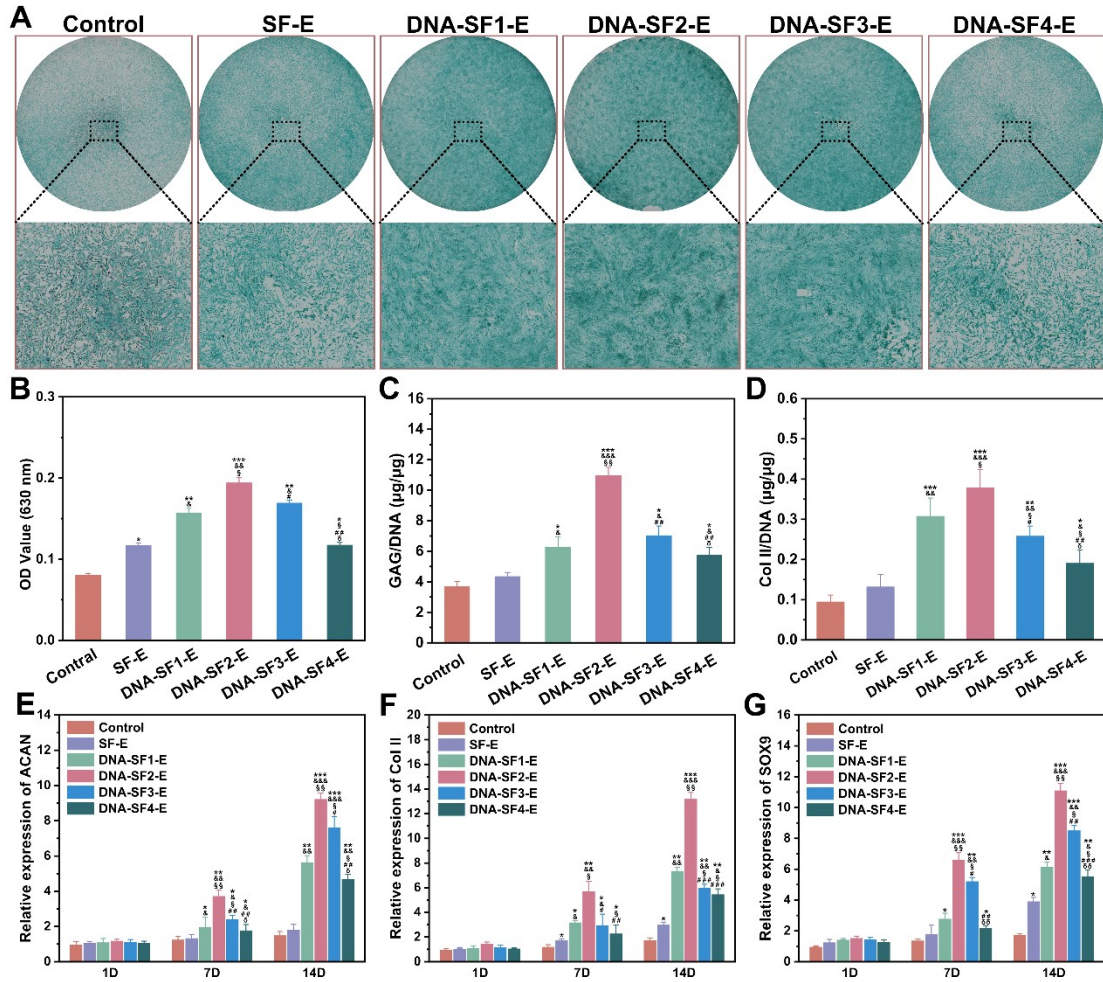

**Figure S9.** The effect of hydrogels-E on BMSCs chondrogenic differentiation. (A) Alcian staining of the BMSCs cultured on the SF-E hydrogels and DNA-SF-E hydrogels for 7 days (scale bars 200 µm). (B) Quantification of alcian blue staining. (C and D) Relative production of GAG and collagen II for BMSCs cultured on the SF-E hydrogels and DNA-SF-E hydrogels at 7 days. (E-G) qRT-PCR results of mRNA expression of ACAN, Col II and Sox9 in BMSCs cultured on SF-E hydrogels and DNA-SF-E hydrogels for 1, 7 and 14 days. (\*: compared to value at Control groups, &: compared to value at SF-E groups, §: compared to value at DNA-SF1-E groups, #: compared to value at DNA-SF2-E groups, δ: compared to value at DNA-SF3-E groups.)

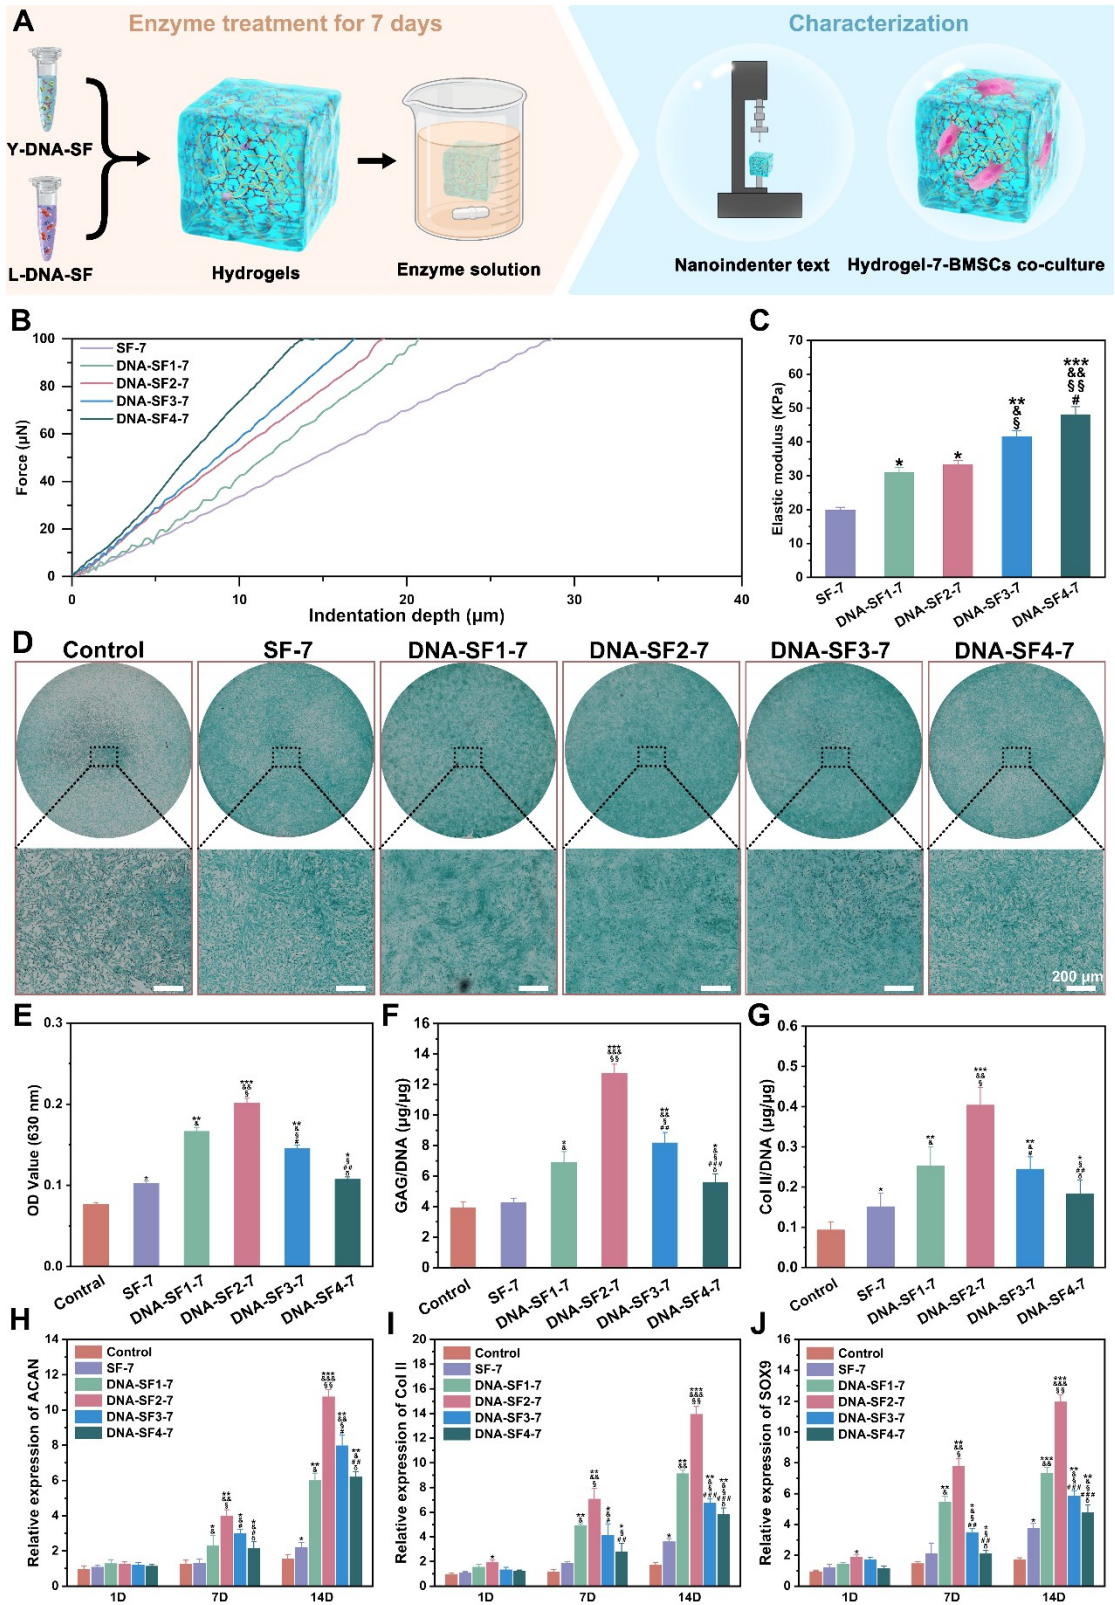

**Figure S10.** Dynamic analysis of SF hydrogels and DNA-SF hydrogels (D 7). (A) Schematic diagram of dynamic analysis experiment (D 7). (B) Stress-strain curves of SF-7 hydrogels and DNA-SF-7 hydrogels tested by nanoindenter. (C) Elastic modulus of SF-7 hydrogels and DNA-SF-7 hydrogels. (D) Alcian staining of the BMSCs cultured on the SF-7 hydrogels and DNA-SF-7



hydrogels for 7 days (scale bars 200  $\mu\text{m}$ ). (B) Quantification of alcian blue staining. (F and G) Relative production of GAG and collagen II for BMSCs cultured on the SF-7 hydrogels and DNA-SF-7 hydrogels at 7 days. (H-J) qRT-PCR results of mRNA expression of ACAN, Col II and Sox9 in BMSCs cultured on SF-7 hydrogels and DNA-SF-7 hydrogels for 1, 7 and 14 days. (\*: compared to value at Control groups, &: compared to value at SF-7 groups, §: compared to value at DNA-SF1-7 groups, #: compared to value at DNA-SF2-7 groups,  $\delta$ : compared to value at DNA-SF3-7 groups.)

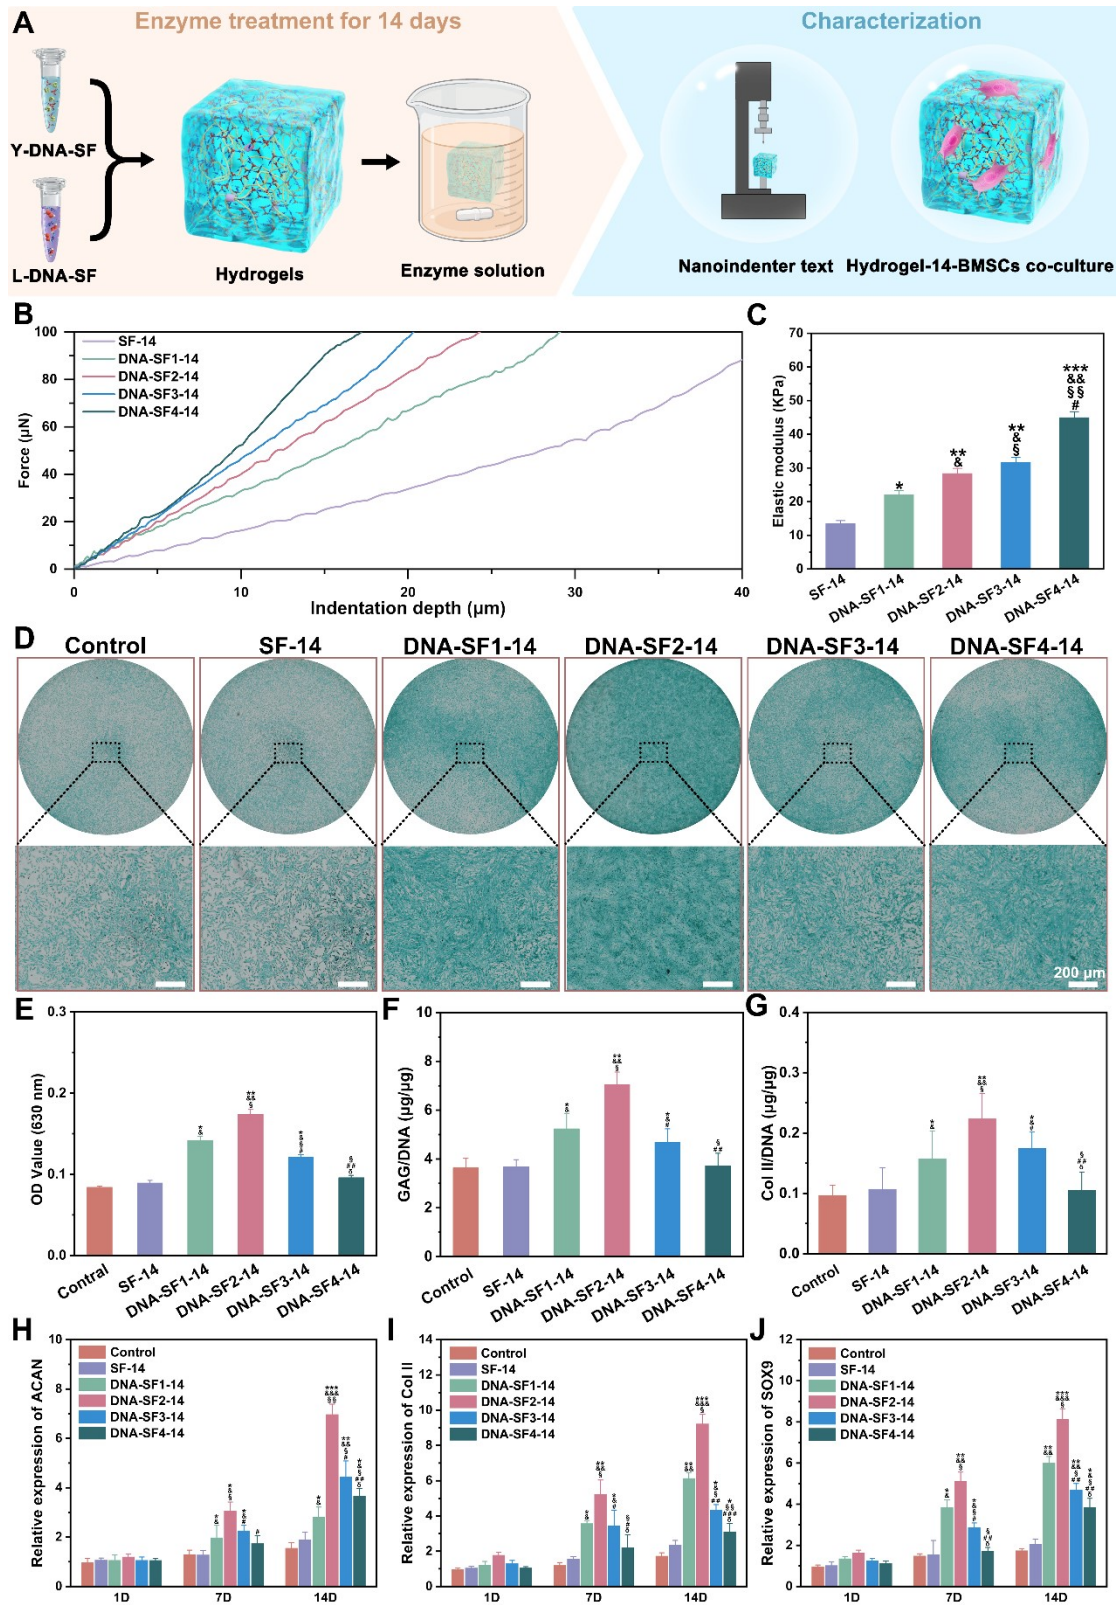

**Figure S11.** Dynamic analysis of SF hydrogels and DNA-SF hydrogels (D 14). (A) Schematic diagram of dynamic analysis experiment (D 14). (B) Stress-strain curves of SF-14 hydrogels and DNA-SF-14 hydrogels tested by nanoindenter. (C) Elastic modulus of SF-14 hydrogels and DNA-SF-14 hydrogels. (D) Alcian staining of the BMSCs cultured on the SF-14 hydrogels and DNA-SF-

14 hydrogels for 7 days (scale bars 200  $\mu\text{m}$ ). (B) Quantification of alcian blue staining. (F and G) Relative production of GAG and collagen II for BMSCs cultured on the SF-14 hydrogels and DNA-SF-14 hydrogels at 7 days. (H-J) qRT-PCR results of mRNA expression of ACAN, Col II and Sox9 in BMSCs cultured on SF-14 hydrogels and DNA-SF-14 hydrogels for 1, 7 and 14 days. (\*: compared to value at Control groups, &: compared to value at SF-14 groups, §: compared to value at DNA-SF1-14 groups, #: compared to value at DNA-SF2-14 groups,  $\delta$ : compared to value at DNA-SF3-14 groups.)

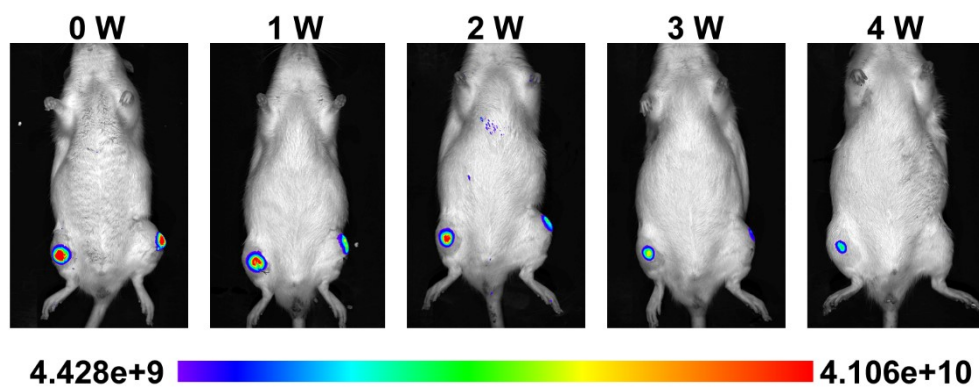

**Figure S12.** *In vivo* degradation behavior analysis of SF hydrogel (left hind legs) and DNA-SF hydrogels (left hind legs).

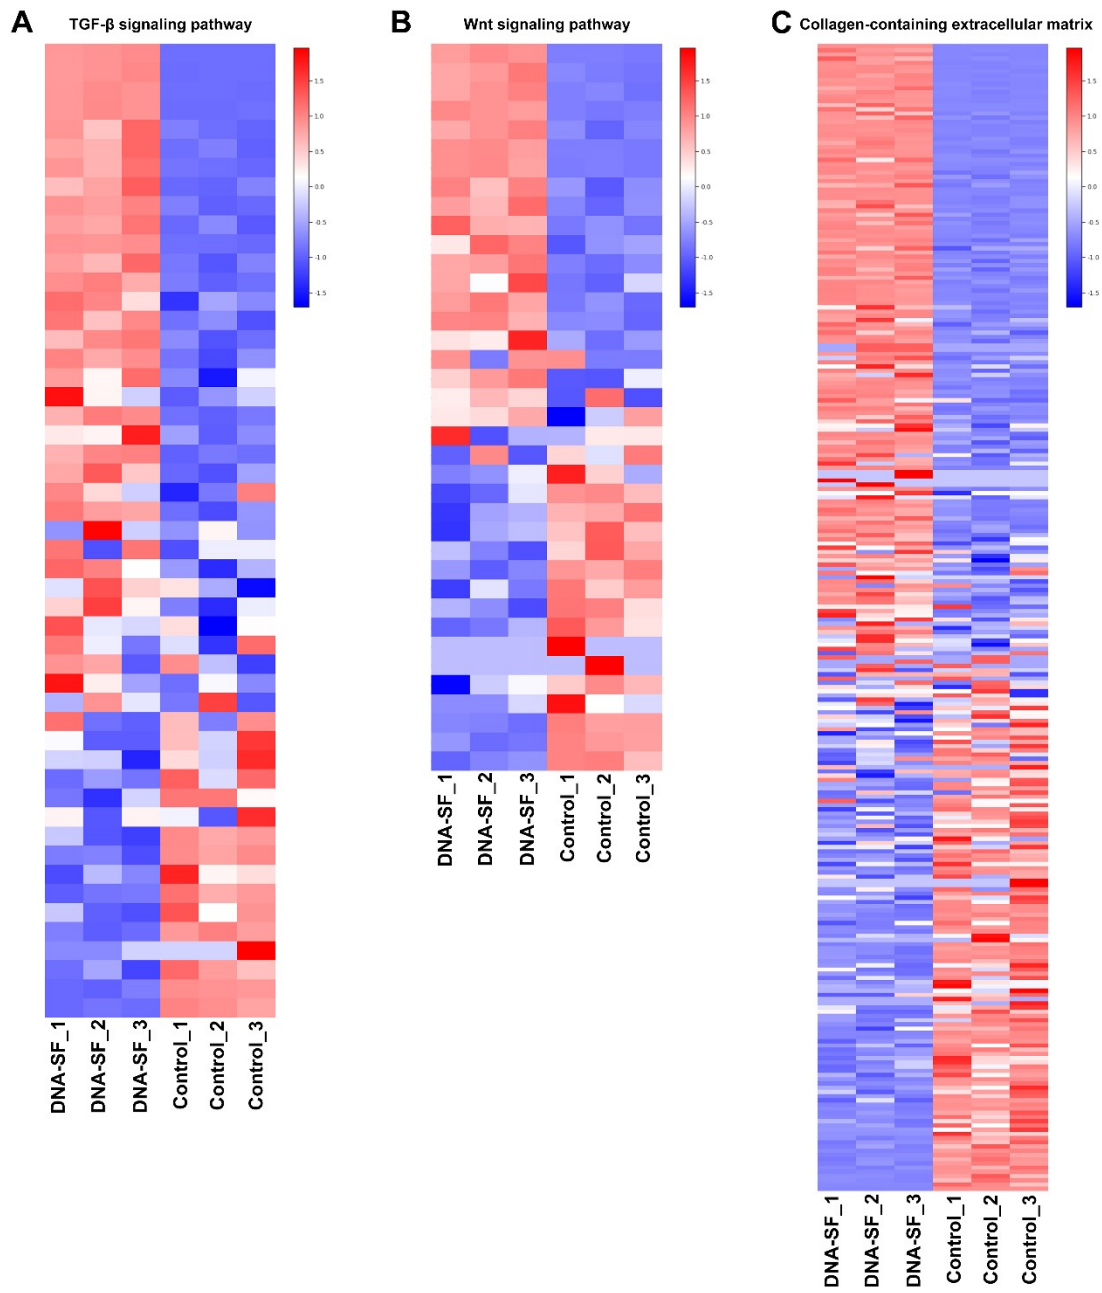

**Figure S13.** Heatmap of (A) TGF- $\beta$  signaling pathway, (B) Wnt signaling pathway and (C) Collagen-containing extracellular matrix.

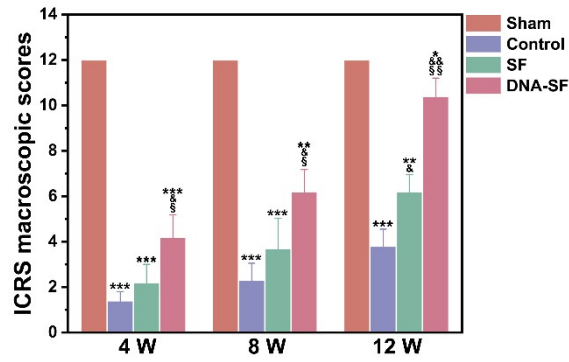

**Figure S14.** ICRS macroscopic score grading of the cartilage defect at 4, 8 and 12 weeks after treatment. (\*: compared to value at Sham groups, &: compared to value at Control groups, §: compared to value at SF groups.)

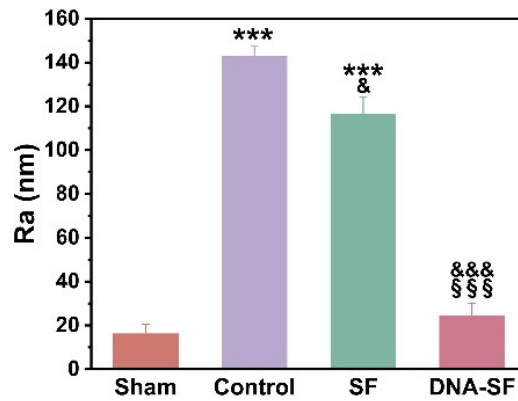

**Figure S15.** Quantitative analysis of cartilage surface roughness. (\*: compared to value at Sham groups, &: compared to value at Control groups, §: compared to value at SF groups.)

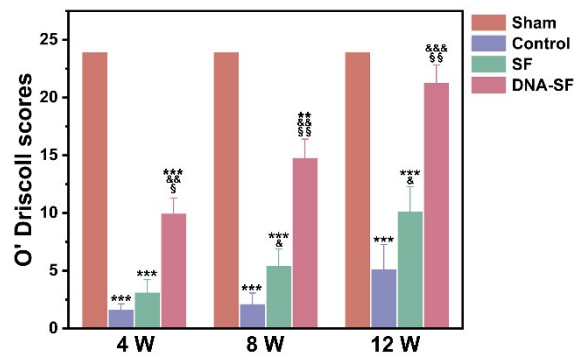

**Figure S16.** O'Driscoll score grading of the cartilage defect at 4, 8 and 12 weeks after treatment. (\*: compared to value at Sham groups, &: compared to value at Control groups, §: compared to value at SF groups.)

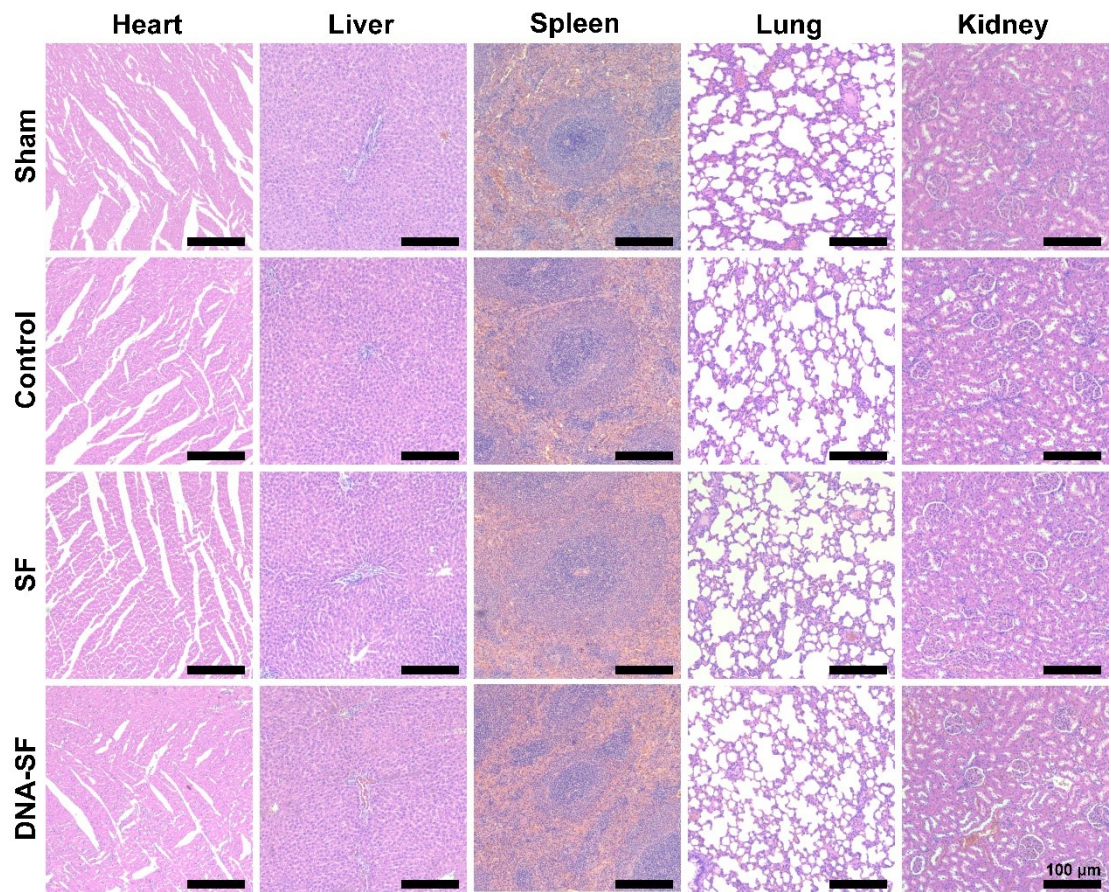

Figure S17. The toxicity of in situ nanocomposite hydrogel at 12 weeks. Scale bar: 100  $\mu\text{m}$ .

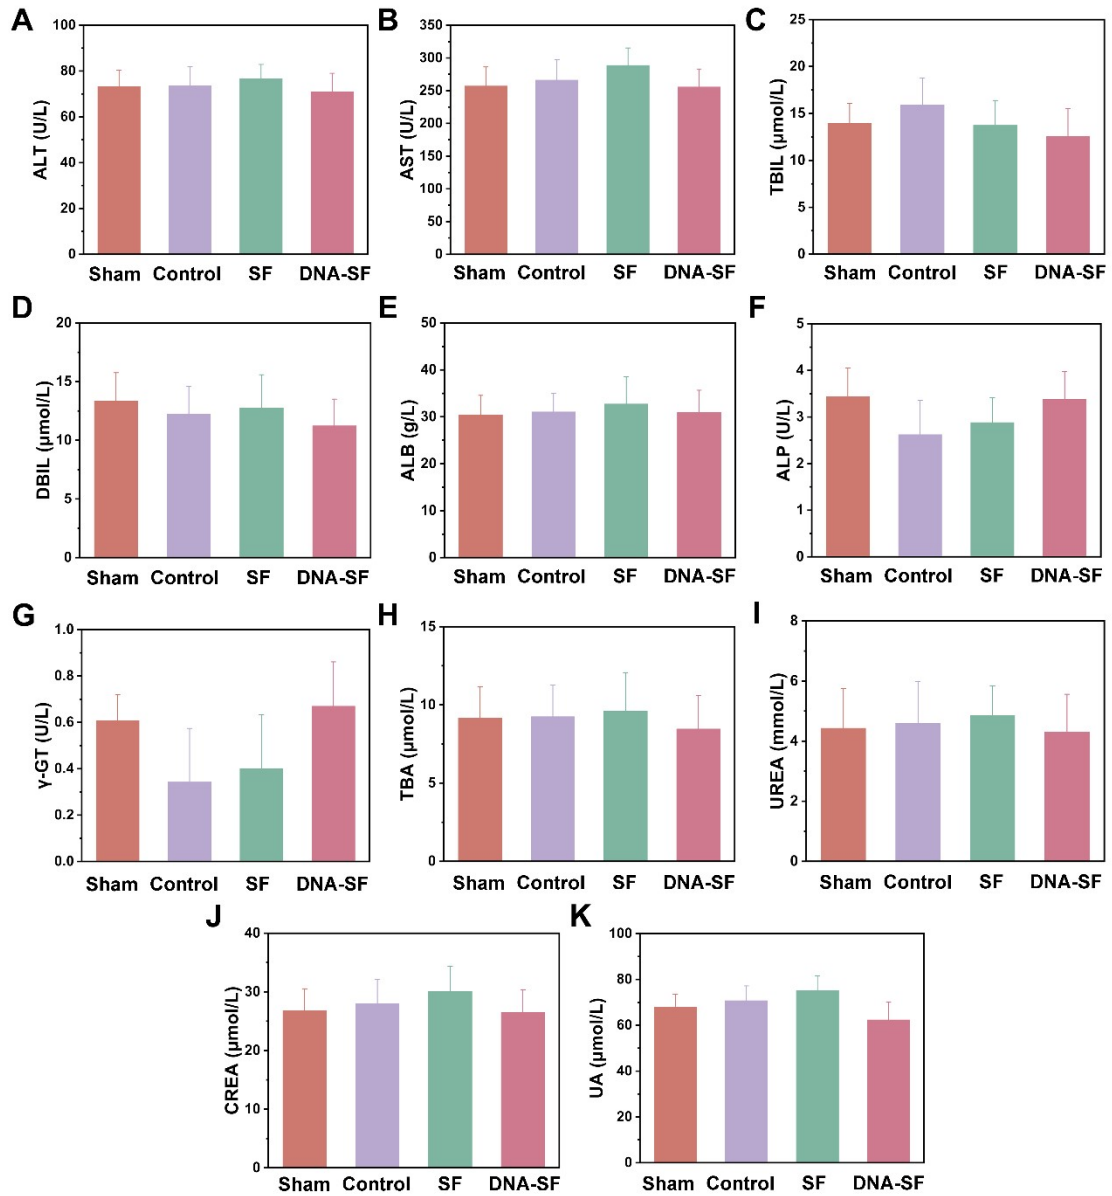

**Figure S18.** Liver and kidney function testing: (A) Alanine aminotransferase. (B) Aspartate aminotransferase. (C) Total bilirubin. (D) Direct bilirubin. (E) Albumin. (F) Alkaline phosphatase. (G)  $\gamma$ -glutamyl transferase. (H) Total bile acid. (I) Urea. (J) Creatinine. (K) Uric acid.
